# Supplementary material for: Japonamides A and B, Two New Cyclohexadepsipeptides from the Marine-Sponge-Derived Fungus Aspergillus japonicus and Their Synergistic Antifungal Activities
Source: MDPI journal article supplement (doi:10.3390/jof8101058), 2022-10-09
Supplement: s1 [file s1]

## Supporting Information

# Japonamides A and B, Two New Cyclohexadepsipeptides from the Marine-Sponge- Derived Fungus *Aspergillus japonicus* and Their Synergistic Antifungal Activities

Haifeng Wang <sup>1,†</sup>, Rui Zhang <sup>1,†</sup>, Ben Ma <sup>1</sup>, Wenzhao Wang <sup>2</sup>, Chong Yu <sup>1</sup>, Junjie Han <sup>2</sup>, Lingjuan Zhu <sup>1</sup>, Xue Zhang <sup>1</sup>, Huanqin Dai <sup>2</sup>, Hongwei Liu <sup>1,2,\*</sup> and Baosong Chen <sup>2,\*</sup>

<sup>1</sup> School of Traditional Chinese Materia Medica, Shenyang Pharmaceutical University, Shenyang 110016, China

<sup>2</sup> State Key Laboratory of Mycology, Institute of Microbiology, Chinese Academy of Sciences, Beijing 100190, China

\* Correspondence: liuhw@im.ac.cn (H.L.); chenbs@im.ac.cn (B.C.)

† These authors contributed equally to this work.

## Table of contents

|                                                                                                     |    |
|-----------------------------------------------------------------------------------------------------|----|
| <b>Figure S1</b> Advanced Marfey's analysis of compound <b>1</b> .                                  | 3  |
| <b>Figure S2</b> Advanced Marfey's analysis of compound <b>2</b> .                                  | 4  |
| <b>Figure S3</b> $^1\text{H}$ NMR spectrum of compound <b>1</b> in $\text{DMSO-}d_6$ .              | 5  |
| <b>Figure S4</b> $^{13}\text{C}$ NMR spectrum of compound <b>1</b> in $\text{DMSO-}d_6$ .           | 6  |
| <b>Figure S5</b> HSQC spectrum of compound <b>1</b> in $\text{DMSO-}d_6$ .                          | 7  |
| <b>Figure S6</b> $^1\text{H-}^1\text{H}$ COSY spectrum of compound <b>1</b> in $\text{DMSO-}d_6$ .  | 8  |
| <b>Figure S7</b> HMBC spectrum of compound <b>1</b> in $\text{DMSO-}d_6$ .                          | 9  |
| <b>Figure S8</b> ROESY spectrum of compound <b>1</b> in $\text{DMSO-}d_6$ .                         | 10 |
| <b>Figure S9</b> $^1\text{H}$ NMR spectrum of compound <b>2</b> in $\text{DMSO-}d_6$ .              | 11 |
| <b>Figure S10</b> $^{13}\text{C}$ NMR spectrum of compound <b>2</b> in $\text{DMSO-}d_6$ .          | 12 |
| <b>Figure S11</b> HSQC spectrum of compound <b>2</b> in $\text{DMSO-}d_6$ .                         | 13 |
| <b>Figure S12</b> $^1\text{H-}^1\text{H}$ COSY spectrum of compound <b>2</b> in $\text{DMSO-}d_6$ . | 14 |
| <b>Figure S13</b> HMBC spectrum of compound <b>2</b> in $\text{DMSO-}d_6$ .                         | 15 |
| <b>Figure S14</b> ROESY spectrum of compound <b>2</b> in $\text{DMSO-}d_6$ .                        | 16 |

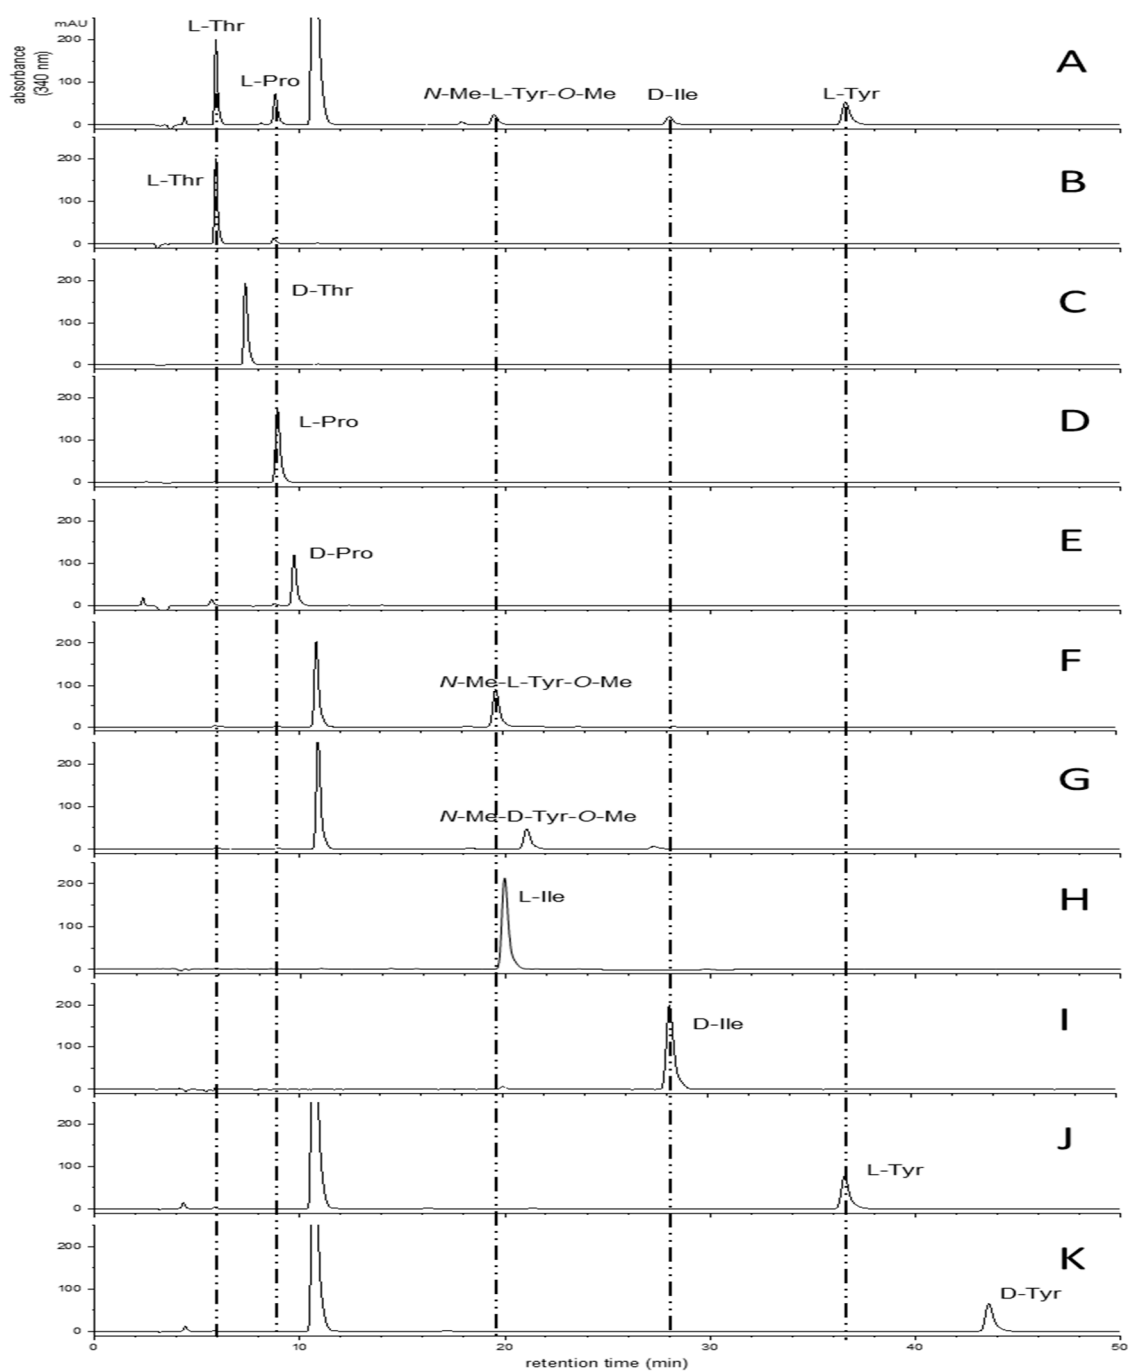

**Figure S1** Advanced Marfey's analysis of compound **1**.

The FDAA derivatives of standards compounds **B-K** were L-Thr (5.9 min), D-Thr (6.9 min), L-Pro (8.8 min), D-Pro (9.6 min), *N*-Me-*O*-Me-L-Tyr (19.3 min), *N*-Me-*O*-Me-D-Tyr (21.2 min), L-Ile (19.9 min), D-Ile (28.1 min), L-Tyr (36.3 min) and D-Tyr (43.7 min), respectively. The derivatives of the acid hydrolysate and the standard amino acids were subjected to RP HPLC analysis (Kromasil C18 column; 5  $\mu$ m, 4.6  $\times$  250mm; 1.0 mL/min; UV detection  $\lambda$  340 nm) with a linear gradient of acetonitrile (30%-50%) in water (TFA, 0.01%) over 50 min.

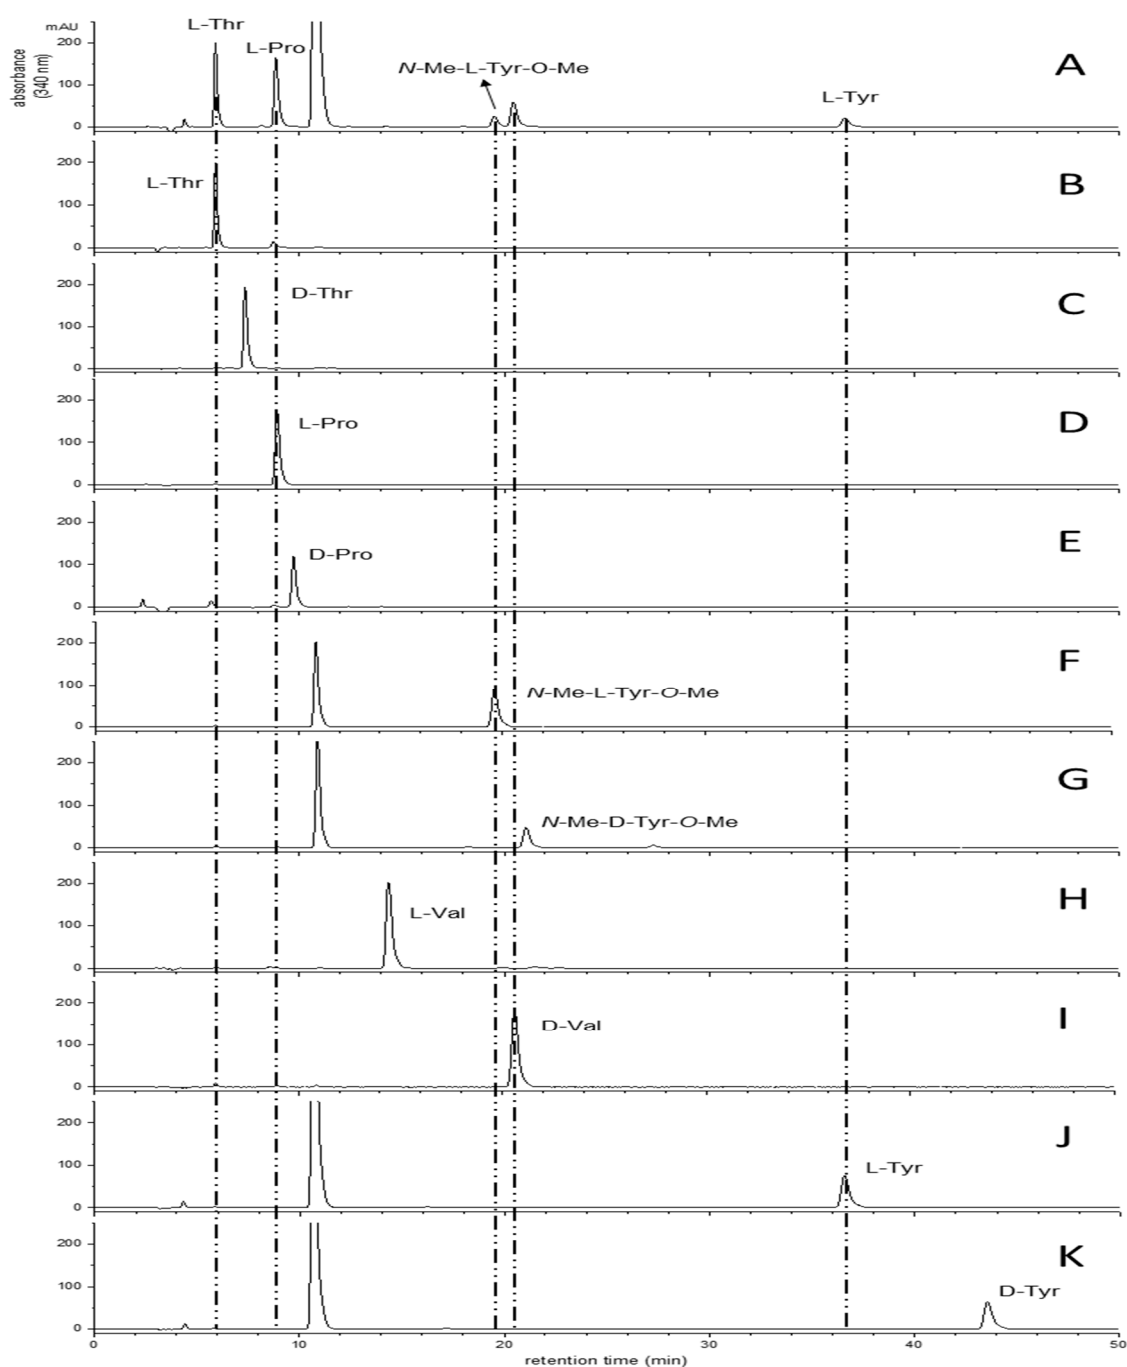

**Figure S2** Advanced Marfey's analysis of compound **2**.

The FDAA derivatives of standards compounds **B-K** were L-Thr (5.9 min), D-Thr (6.9 min), L-Pro (8.8 min), D-Pro (9.6 min), *N*-Me-O-Me-L-Tyr (19.3 min), *N*-Me-O-Me-D-Tyr (21.2 min), L-Val (14.2 min), D-Val (20.5 min), L-Tyr (36.3 min) and D-Tyr (43.7 min), respectively. The derivatives of the acid hydrolysate and the standard amino acids were subjected to RP HPLC analysis (Kromasil C18 column; 5  $\mu$ m, 4.6  $\times$  250mm; 1.0 mL/min; UV detection  $\lambda$  340 nm) with a linear gradient of acetonitrile (30%-50%) in water (TFA, 0.01%) over 50 min.

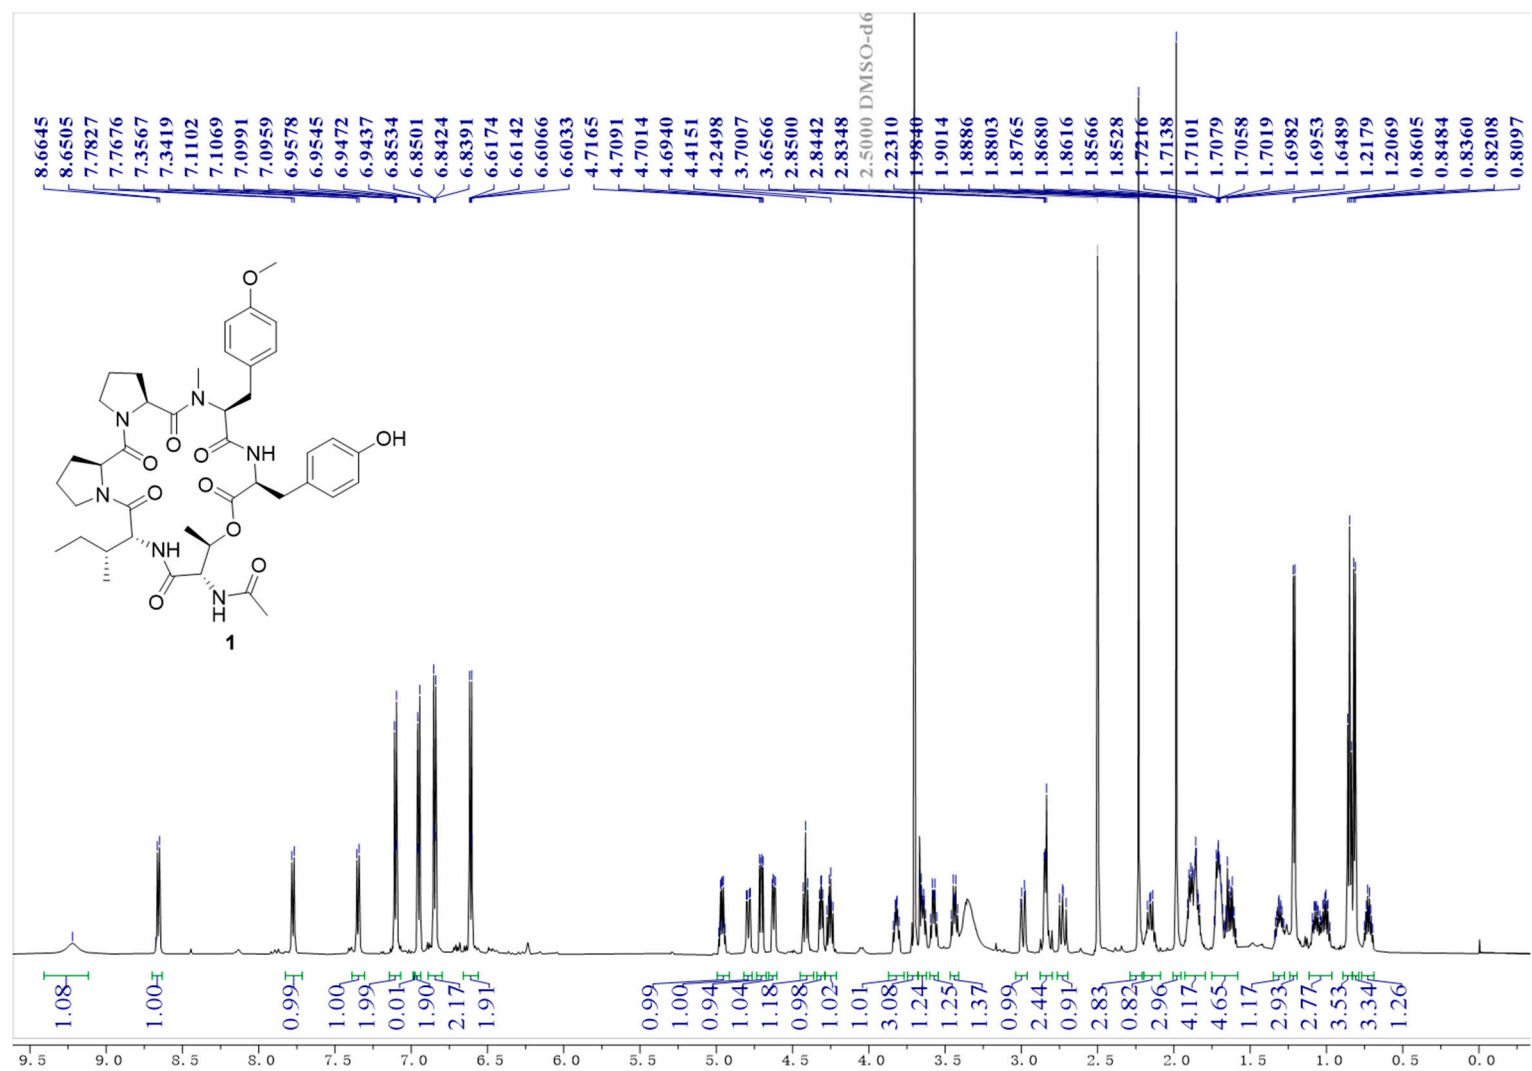

Figure S3  $^1\text{H}$  NMR spectrum of compound 1 in DMSO- $d_6$

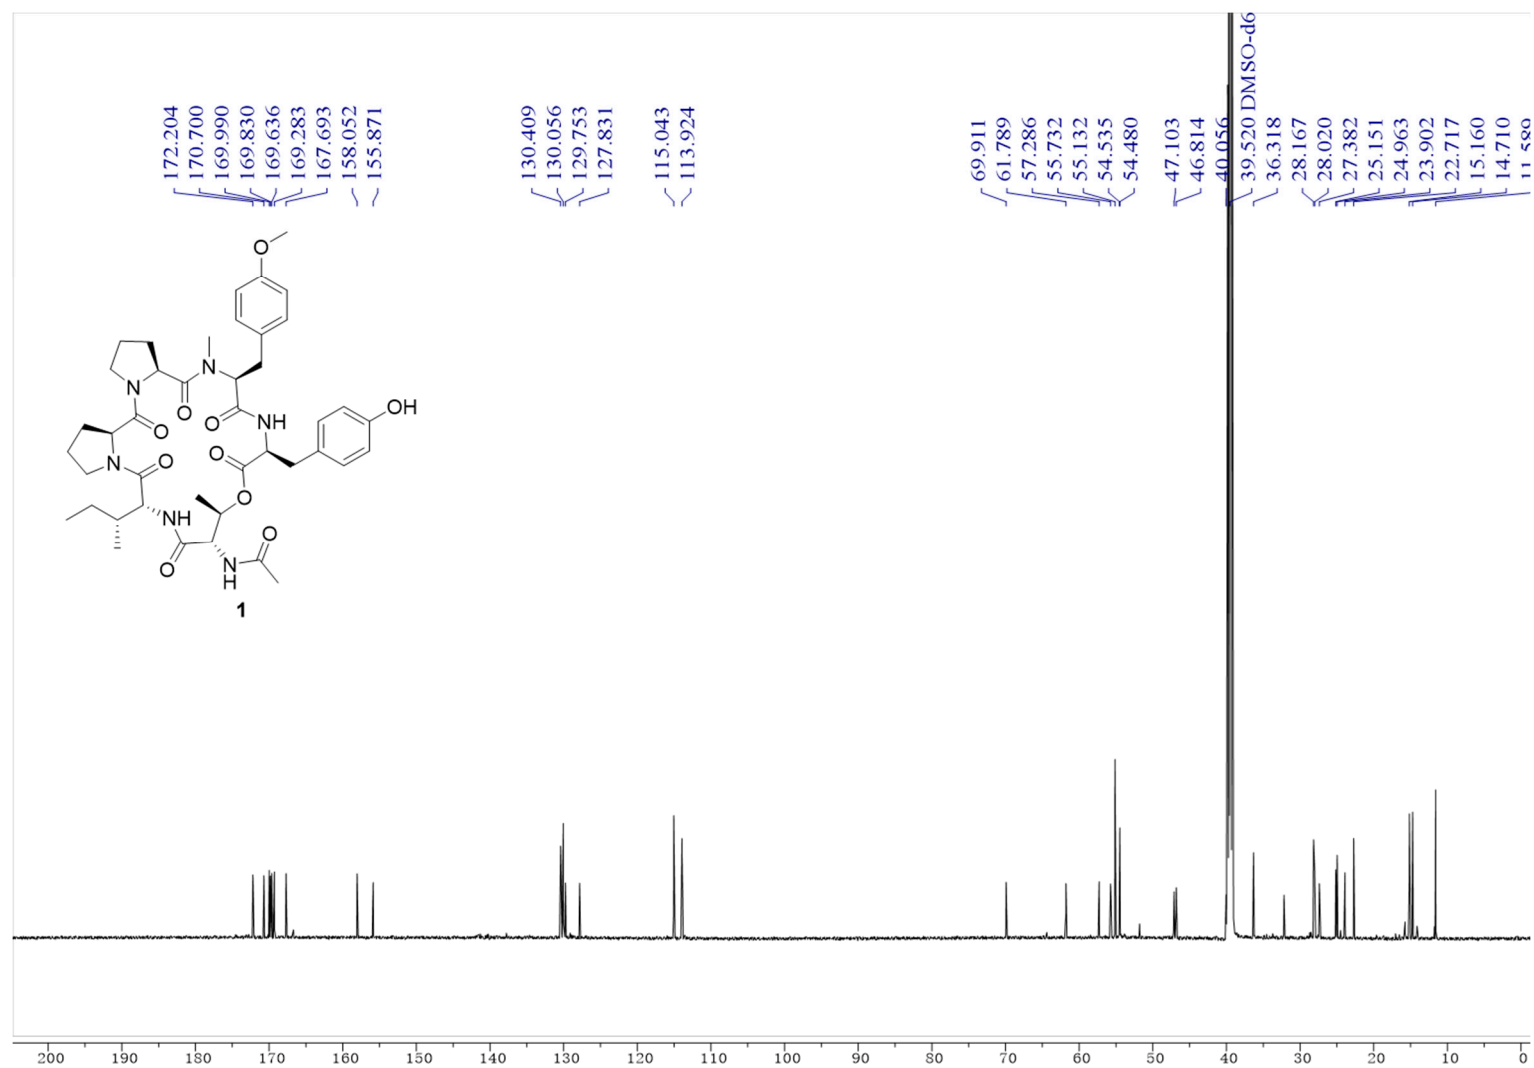

**Figure S4**  $^{13}\text{C}$  NMR spectrum of compound **1** in  $\text{DMSO-}d_6$

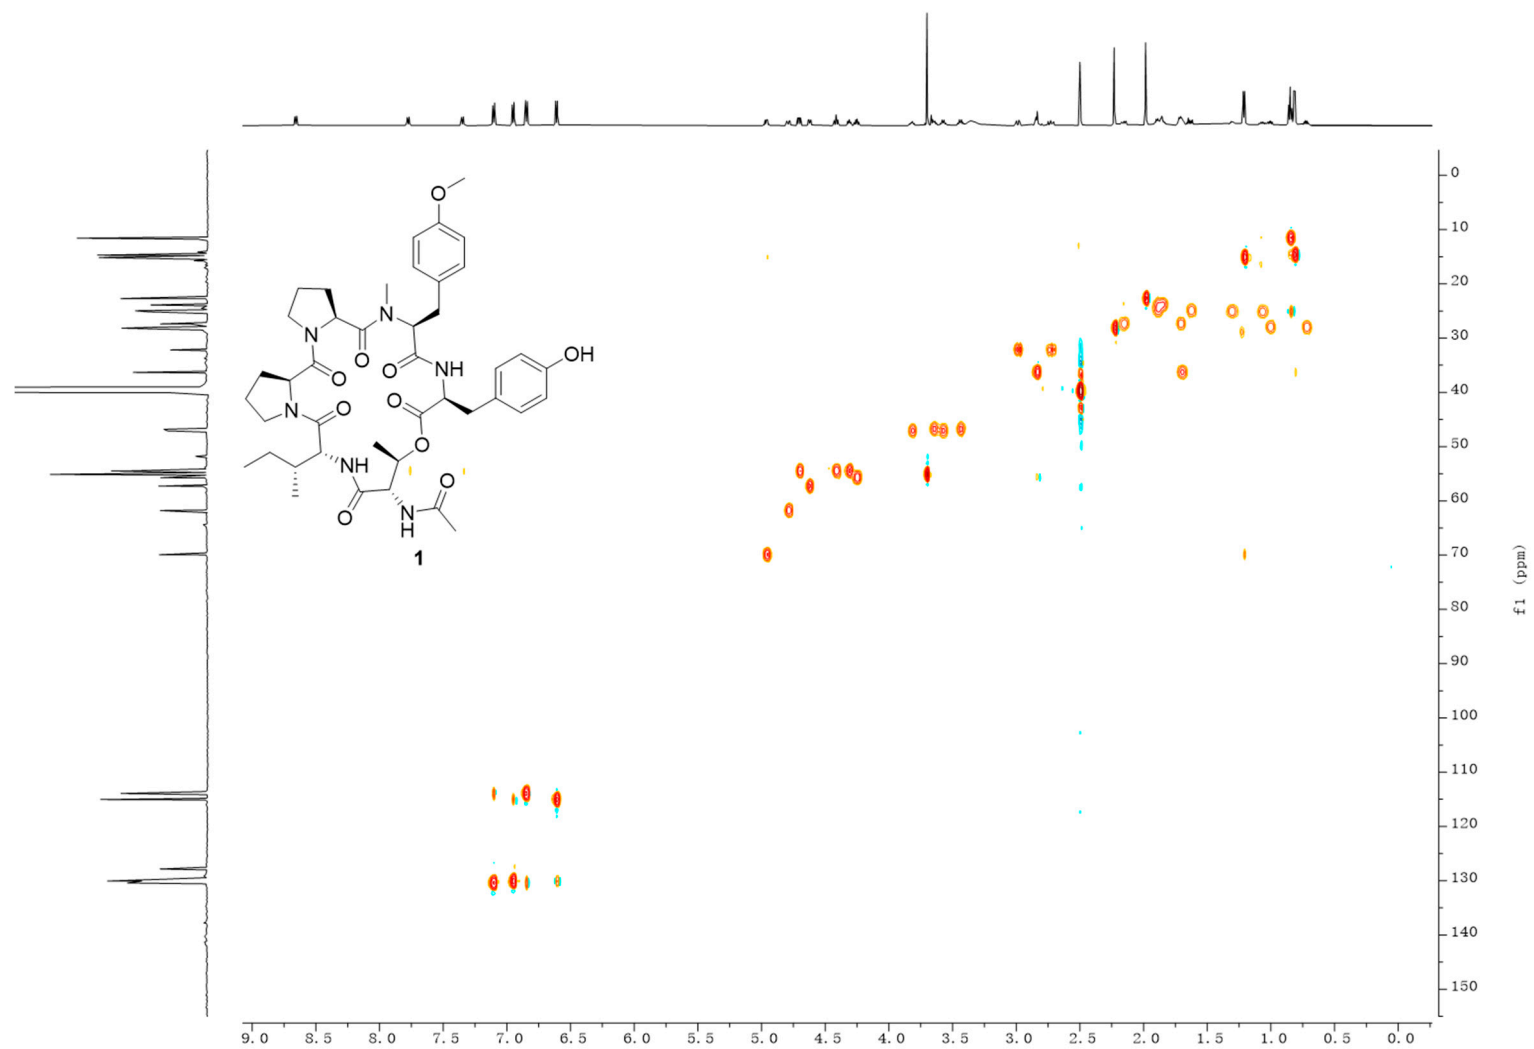

**Figure S5** HSQC spectrum of compound **1** in DMSO-*d*<sub>6</sub>

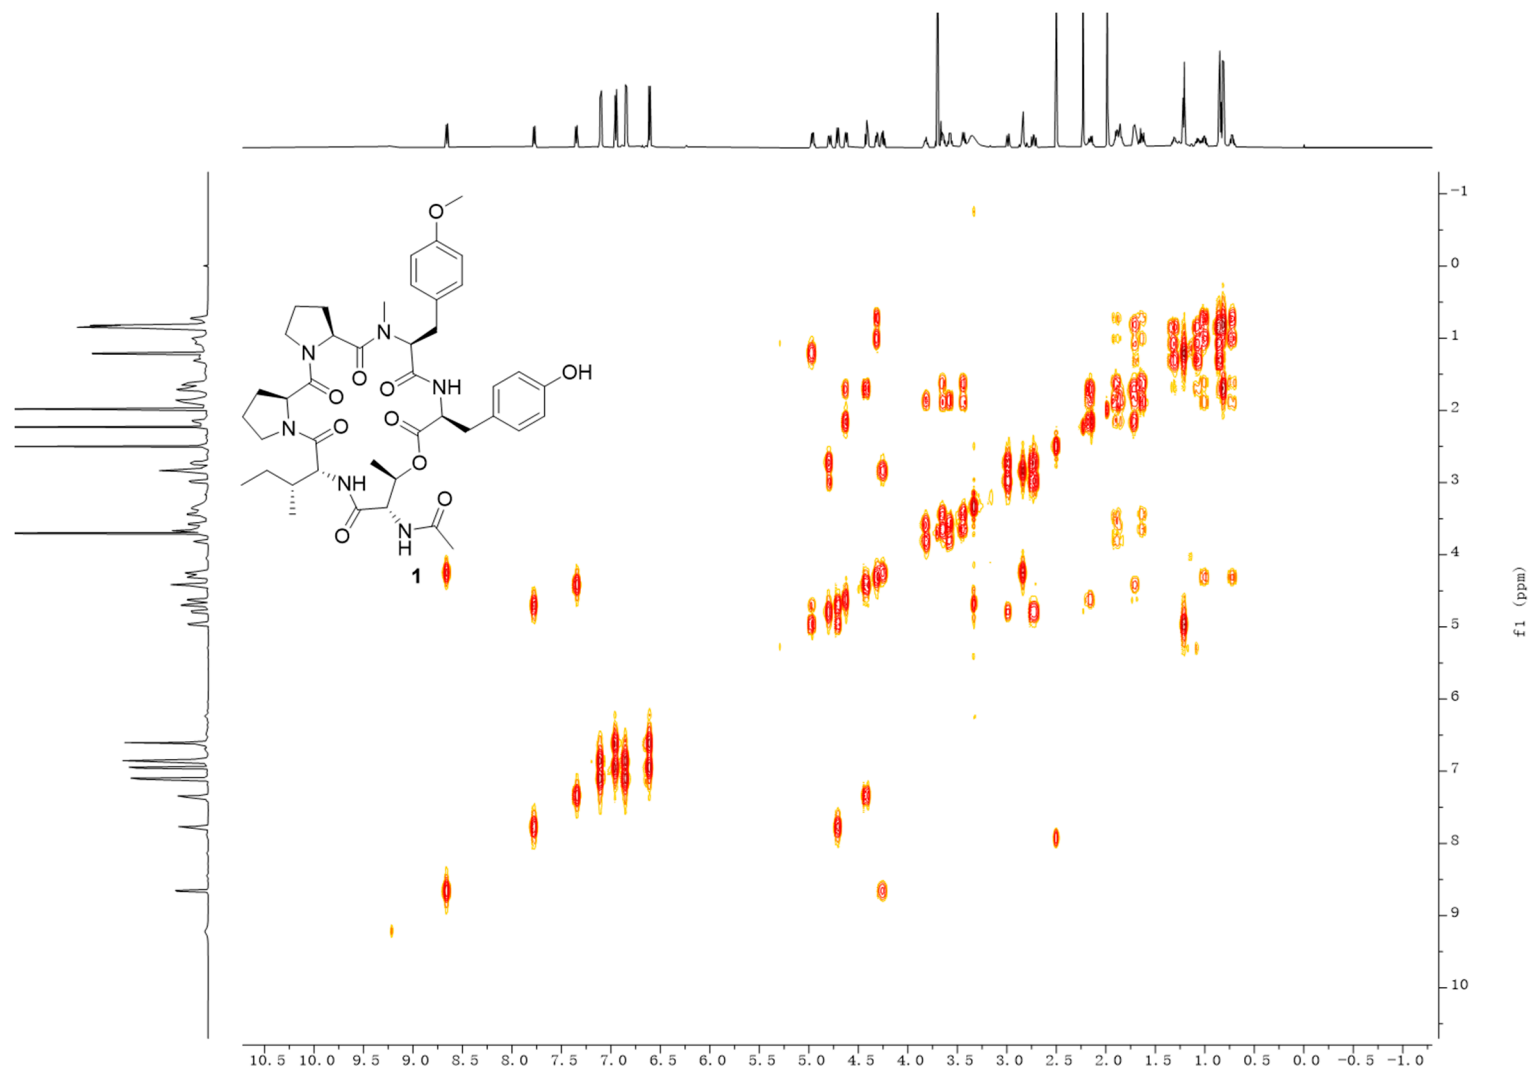

**Figure S6**  $^1\text{H}$ - $^1\text{H}$  COSY spectrum of compound **1** in  $\text{DMSO}-d_6$

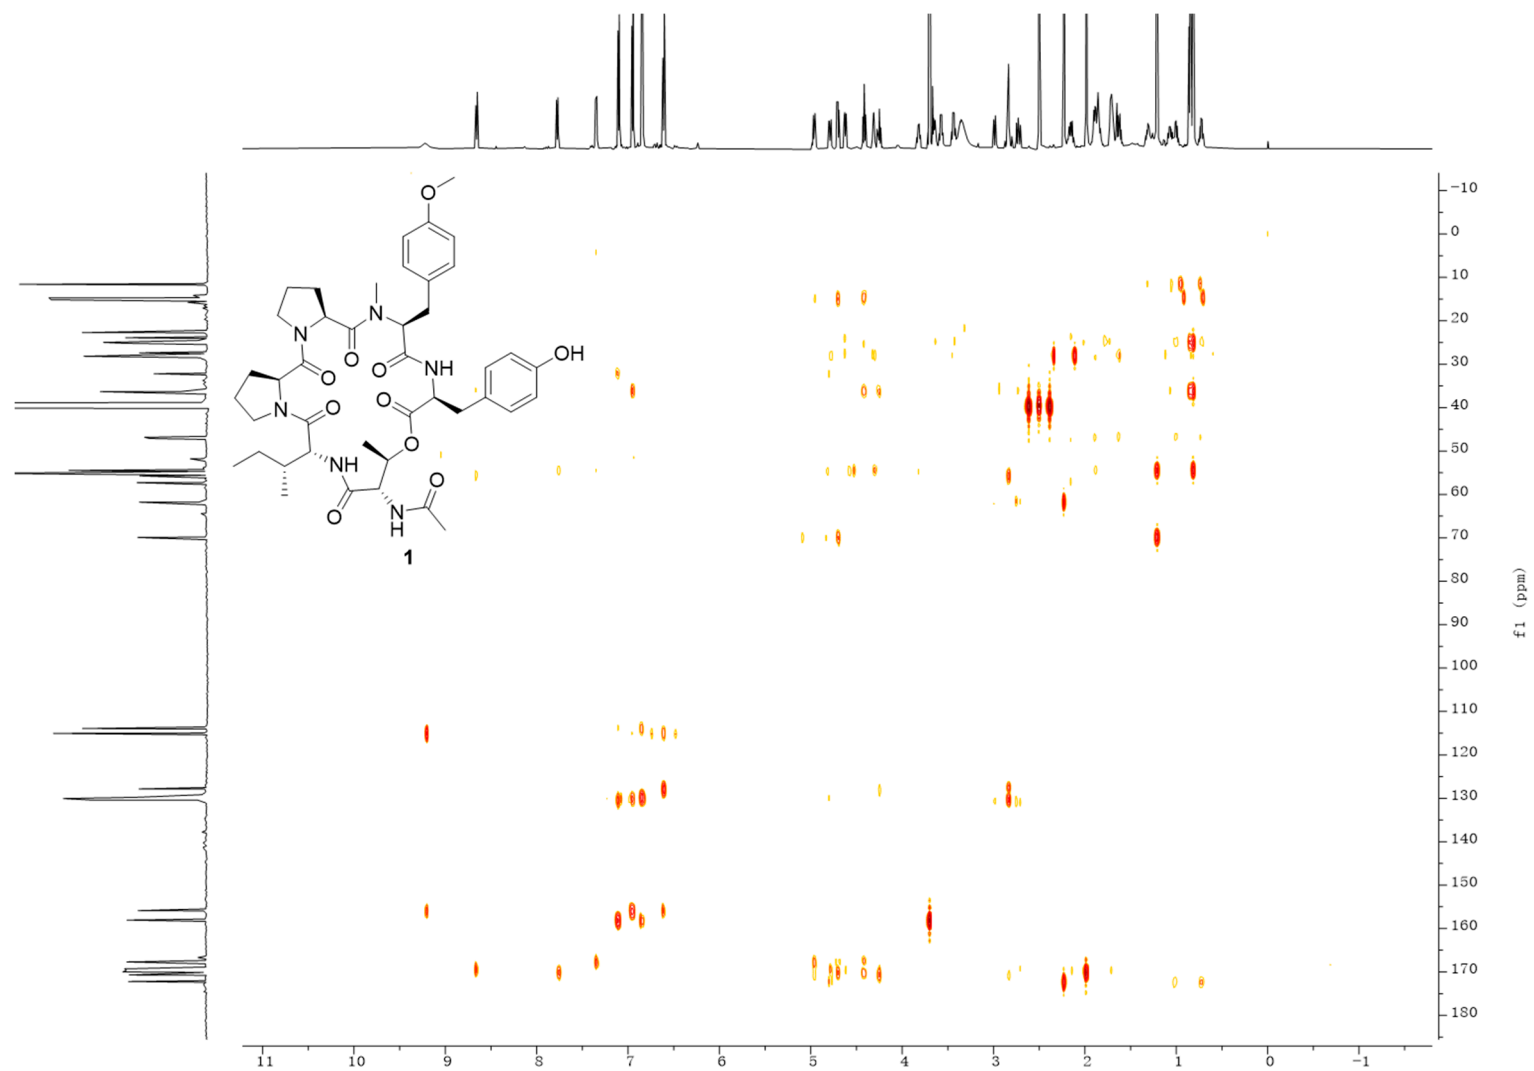

**Figure S7** HMBC spectrum of compound **1** in DMSO-*d*<sub>6</sub>

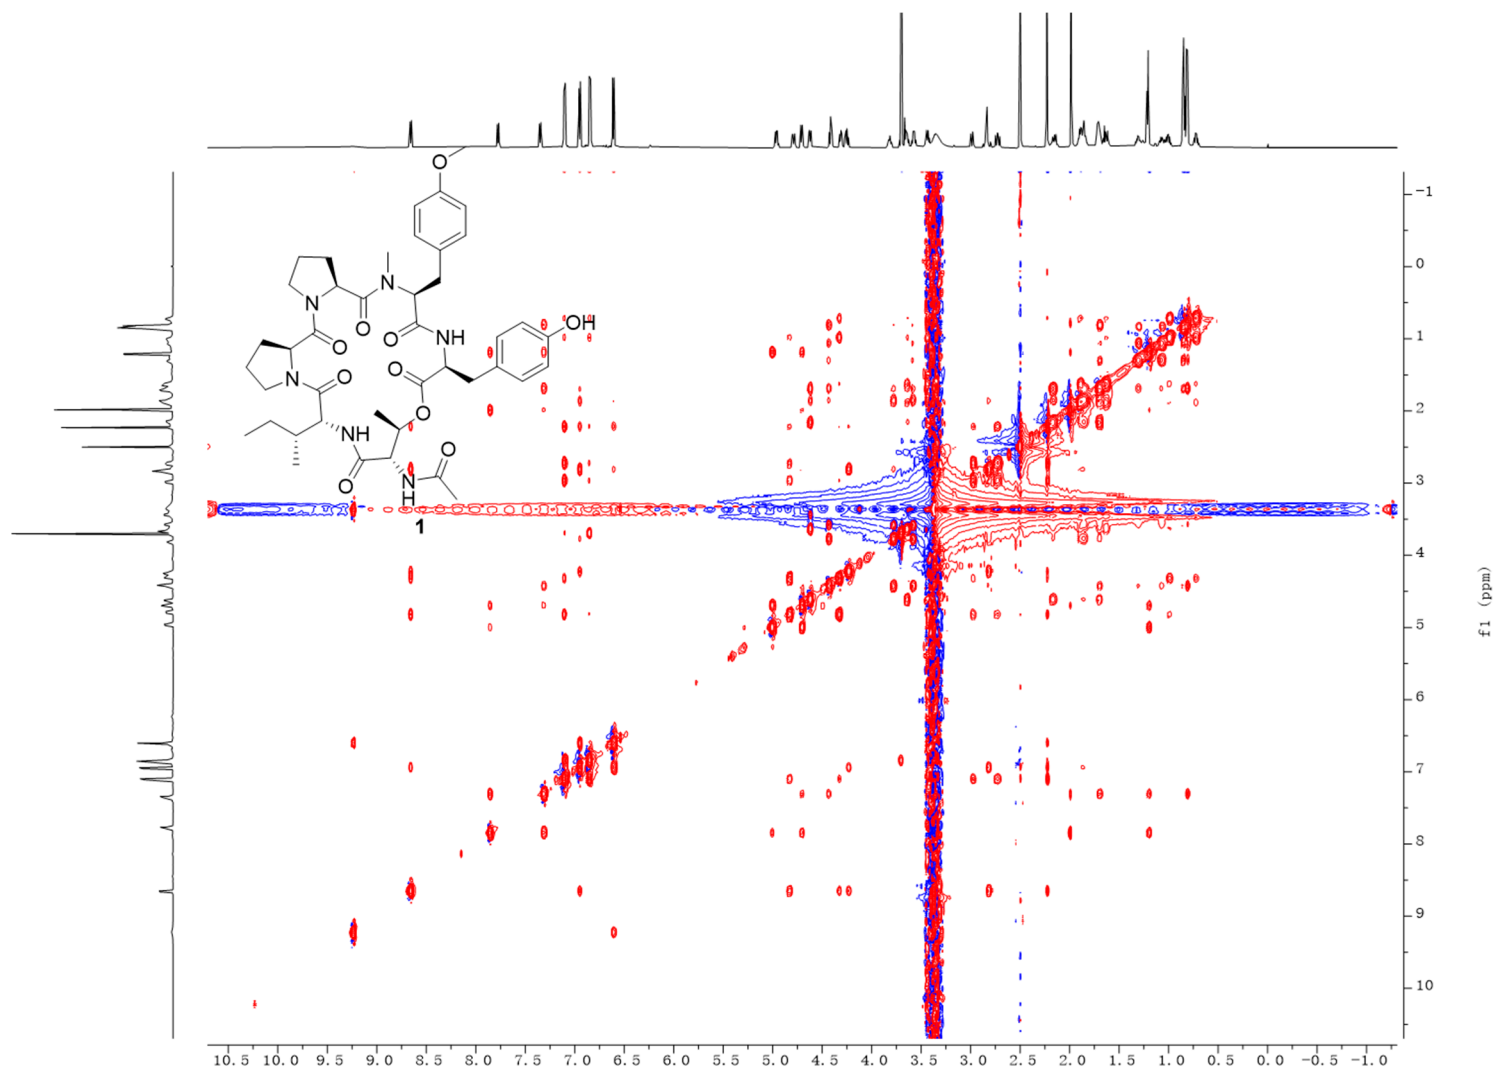

**Figure S8** ROESY spectrum of compound **1** in DMSO-*d*<sub>6</sub>

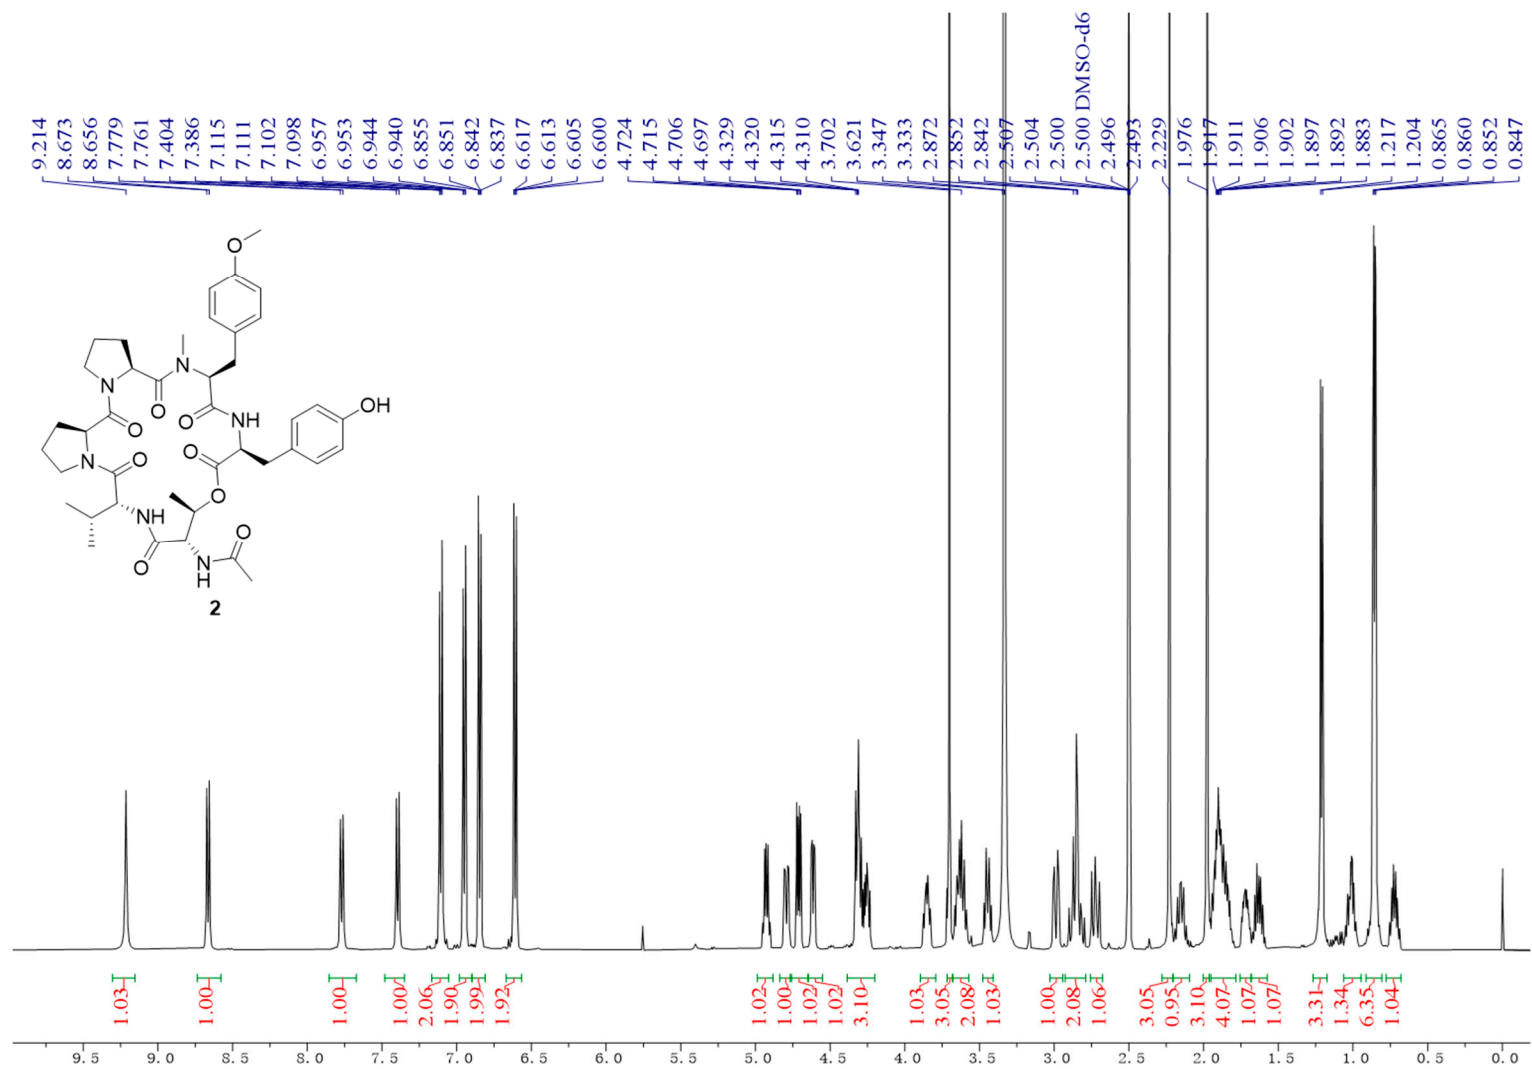

**Figure S9**  $^1\text{H}$  NMR spectrum of compound **2** in DMSO- $d_6$

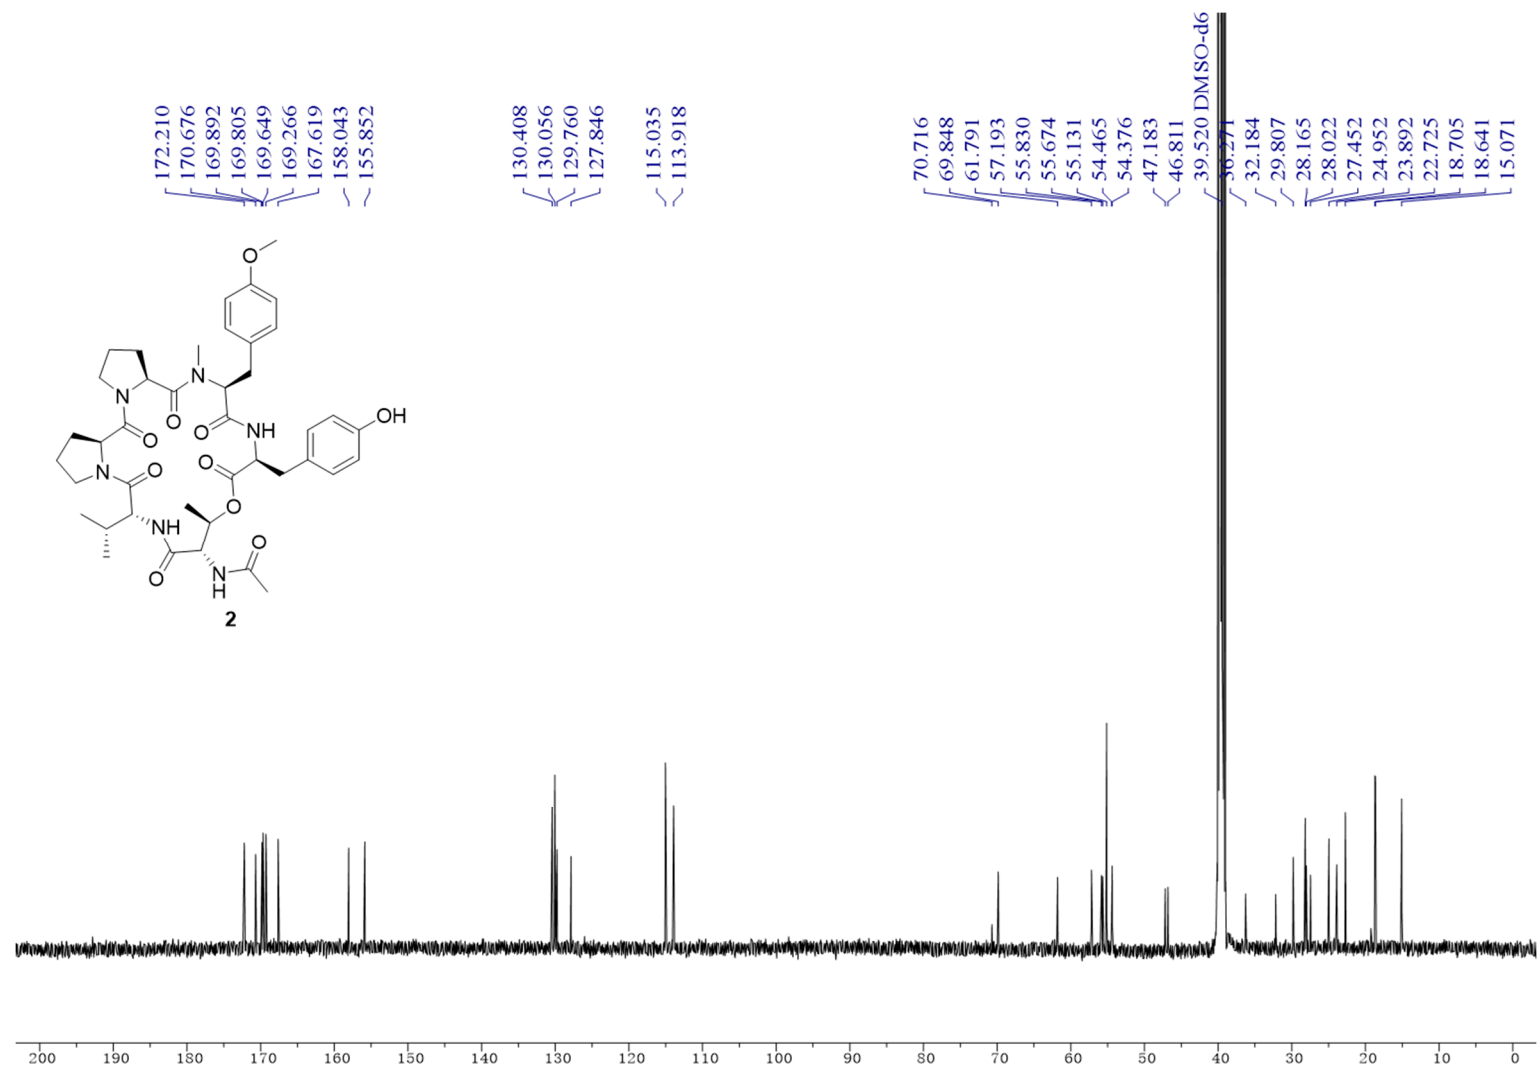

**Figure S10** <sup>13</sup>C NMR spectrum of compound **2** in DMSO-*d*<sub>6</sub>

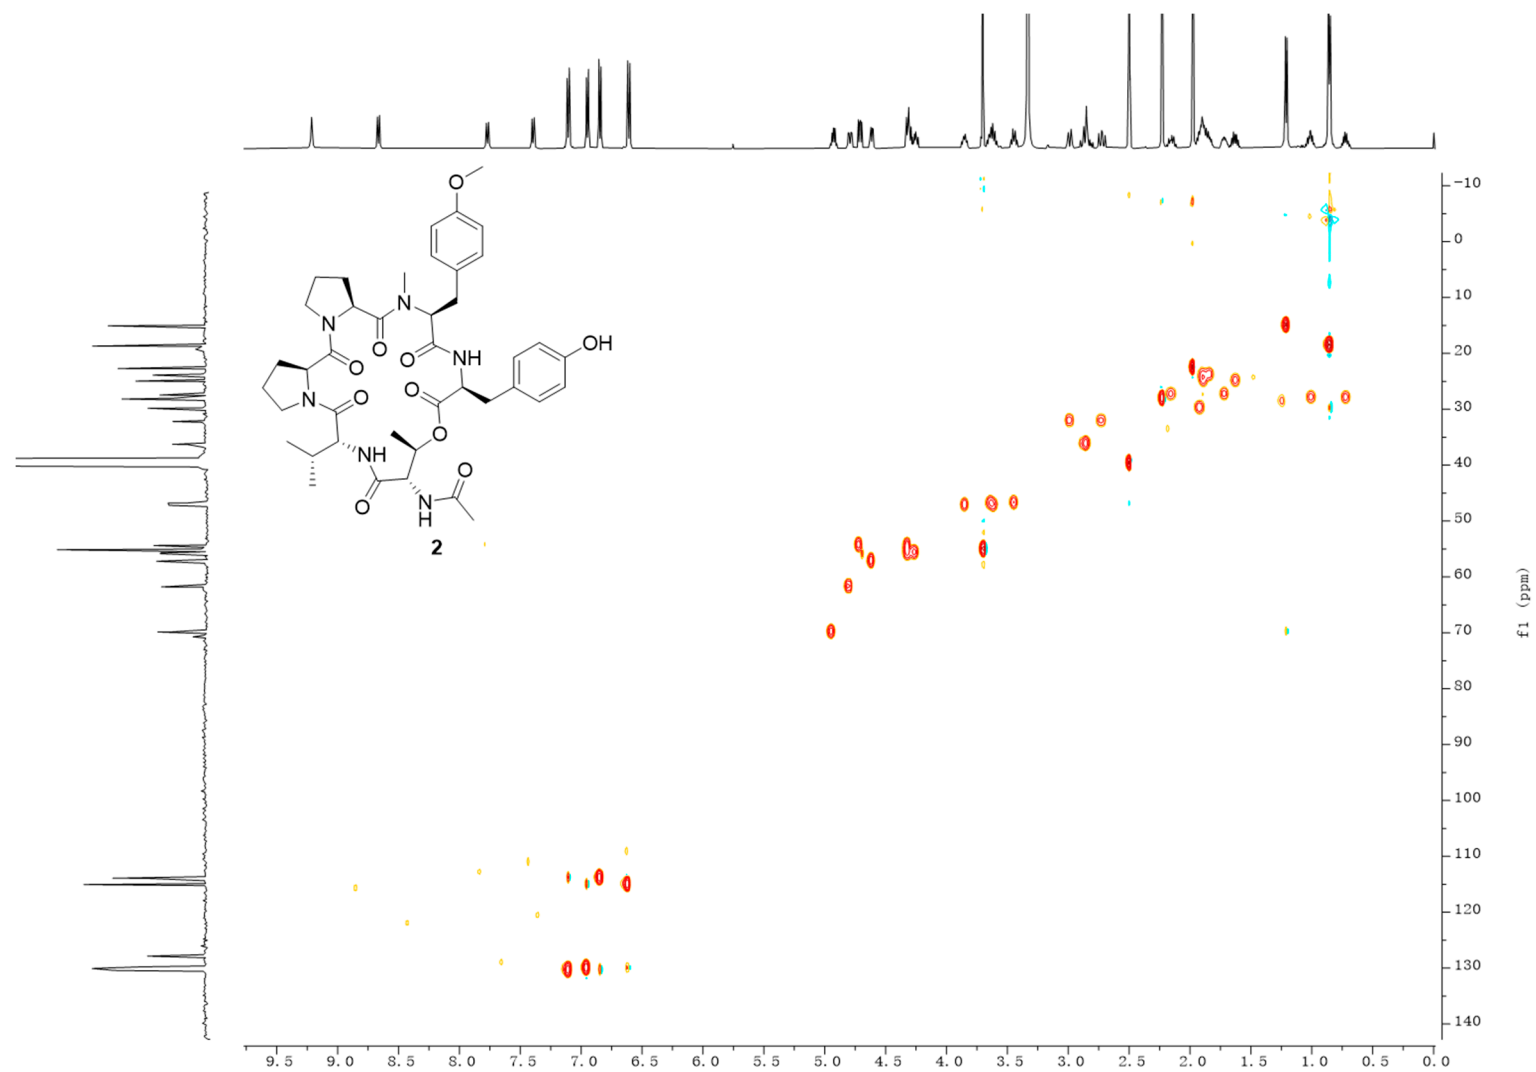

**Figure S11** HSQC spectrum of compound **2** in DMSO-*d*<sub>6</sub>

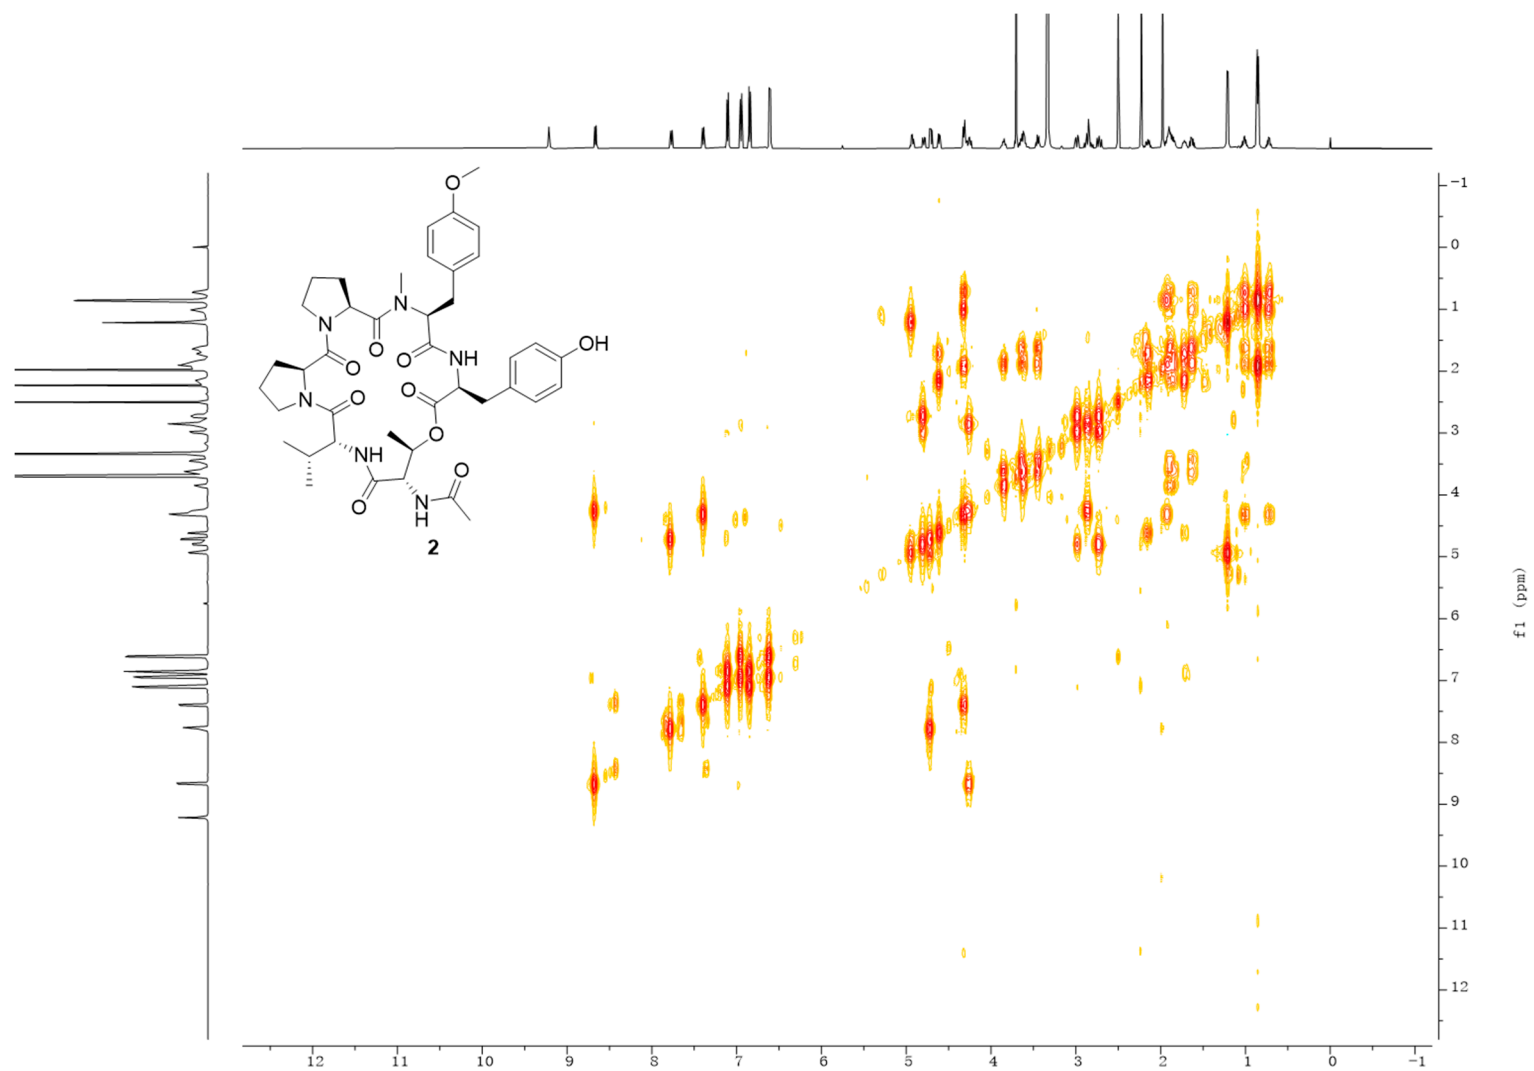

**Figure S12**  $^1\text{H}$ - $^1\text{H}$  COSY spectrum of compound **2** in  $\text{DMSO-}d_6$

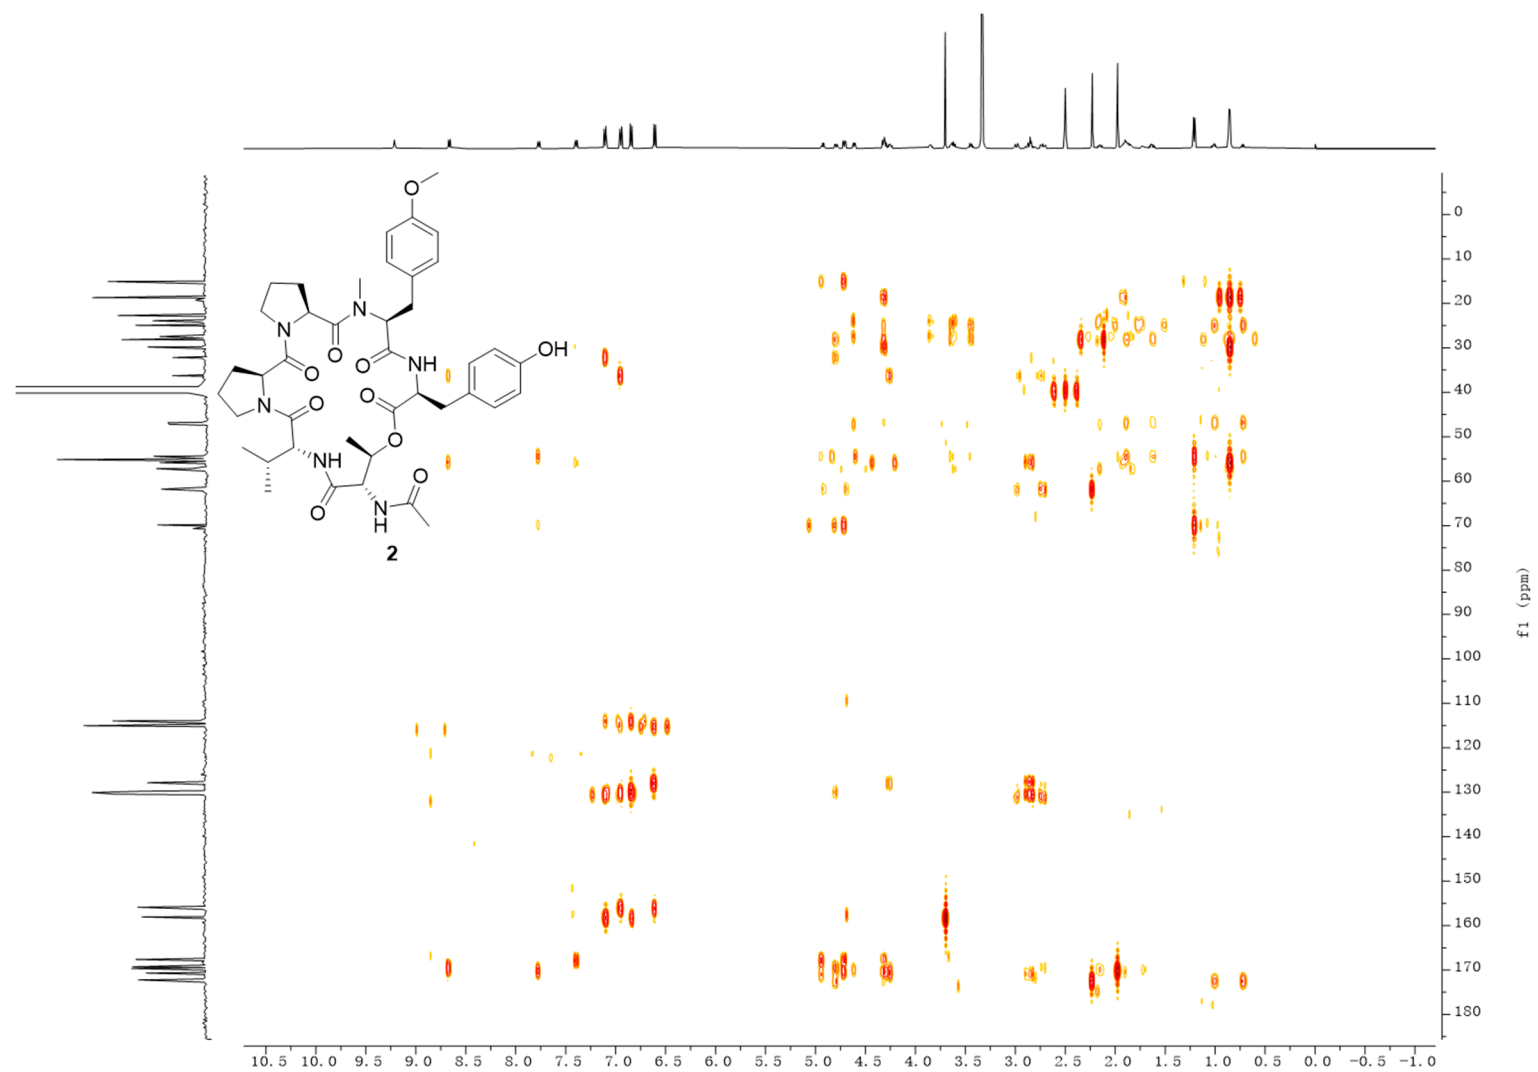

**Figure S13** HMBC spectrum of compound **2** in DMSO-*d*<sub>6</sub>

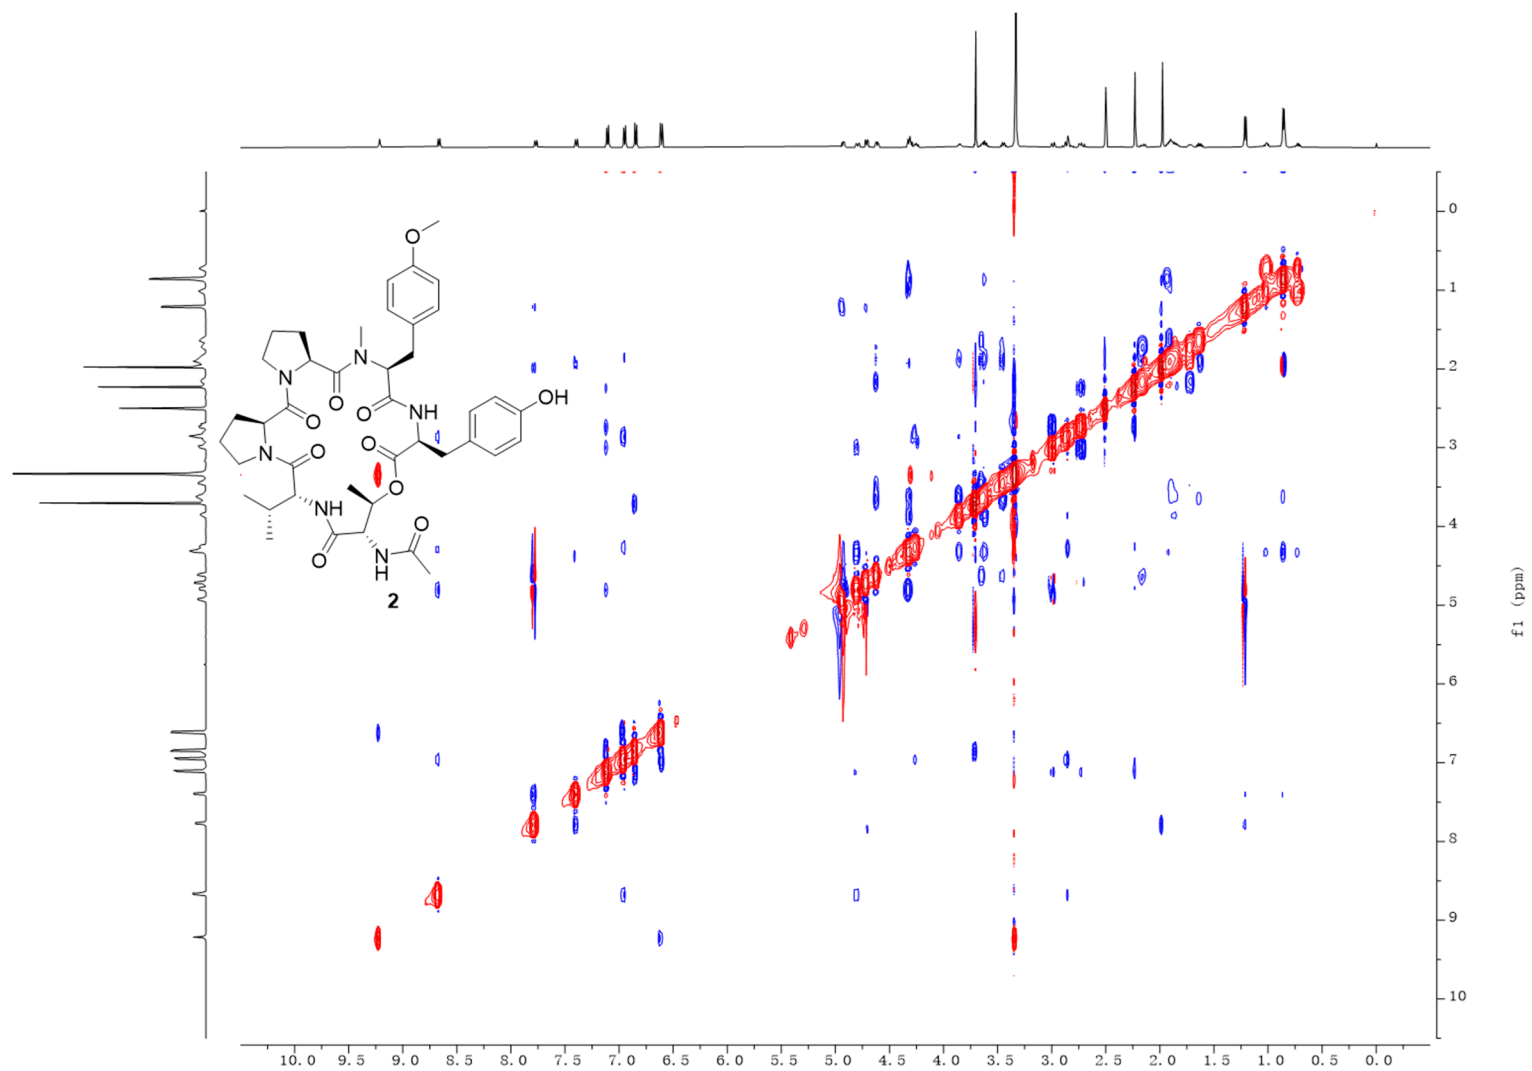

**Figure S14** ROESY spectrum of compound **2** in DMSO-*d*<sub>6</sub>
